# Supplementary material for: Trypanosoma cruzi Parasite Burdens of Several Triatomine Species in Colombia
Source: MDPI journal article supplement (doi:10.3390/tropicalmed7120445), 2022-12-19
Supplement: s1 [file s1]

Table S1. Summary table that contains samples' information for the 182 triatomines analyzed.

| Sample ID | Species                   | Stage | Country  | Department | Municipality | Parasite load | Log10 parasite load | DTU |
|-----------|---------------------------|-------|----------|------------|--------------|---------------|---------------------|-----|
| 35        | <i>Triatoma dimidiata</i> | Adult | Colombia | Boyacá     | Soatá        | 35,397,384    | 7.5489712           | Tcl |
| 63        | <i>Triatoma dimidiata</i> | Adult | Colombia | Boyacá     | Soatá        | 85,356,448    | 7.9312363           | Tcl |
| 75        | <i>Triatoma dimidiata</i> | Adult | Colombia | Boyacá     | Tipacoque    | 14,829,605    | 7.1711296           | Tcl |
| 84        | <i>Triatoma dimidiata</i> | Adult | Colombia | Boyacá     | Tipacoque    | 61,558,340    | 7.7892869           | Tcl |
| 87        | <i>Triatoma dimidiata</i> | Adult | Colombia | Boyacá     | Soatá        | 1,157,104,320 | 9.0633725           | Tcl |
| 94        | <i>Triatoma dimidiata</i> | Adult | Colombia | Boyacá     | Soatá        | 2,311         | 3.3637999           | Tcl |
| 101       | <i>Triatoma dimidiata</i> | Nymph | Colombia | Boyacá     | Tipacoque    | 324           | 2.5105450           | Tcl |
| 113       | <i>Triatoma dimidiata</i> | Adult | Colombia | Boyacá     | Soatá        | 1,461,363,200 | 9.1647582           | Tcl |
| 121       | <i>Triatoma dimidiata</i> | Adult | Colombia | Boyacá     | Soatá        | 9,165,565     | 6.9621592           | Tcl |
| 122       | <i>Triatoma dimidiata</i> | Nymph | Colombia | Boyacá     | Soatá        | 8,663         | 3.9376683           | Tcl |
| 124       | <i>Triatoma dimidiata</i> | Adult | Colombia | Boyacá     | Tipacoque    | 715           | 2.8543060           | Tcl |
| 132       | <i>Triatoma dimidiata</i> | Adult | Colombia | Boyacá     | Soatá        | 271,009       | 5.4329837           | Tcl |
| 134       | <i>Triatoma dimidiata</i> | Adult | Colombia | Boyacá     | Soatá        | 24,664,522    | 7.3920727           | Tcl |
| 157       | <i>Triatoma dimidiata</i> | Adult | Colombia | Boyacá     | Socota       | 12,094        | 4.0825700           | Tcl |
| 159       | <i>Triatoma dimidiata</i> | Adult | Colombia | Boyacá     | Soatá        | 52,042,616    | 7.7163591           | Tcl |
| 160       | <i>Triatoma dimidiata</i> | Adult | Colombia | Boyacá     | Boavita      | 10,906        | 4.0376655           | Tcl |
| 167       | <i>Triatoma dimidiata</i> | Adult | Colombia | Boyacá     | Susacón      | 5,902         | 3.7709992           | Tcl |
| 172       | <i>Triatoma dimidiata</i> | Adult | Colombia | Boyacá     | Soatá        | 878,414       | 5.9436992           | Tcl |
| 173       | <i>Triatoma dimidiata</i> | Adult | Colombia | Boyacá     | Socota       | 30,407,030    | 7.4829740           | Tcl |
| 186       | <i>Triatoma dimidiata</i> | Adult | Colombia | Boyacá     | Socota       | 2,129,457     | 6.3282689           | Tcl |
| 196       | <i>Triatoma dimidiata</i> | Adult | Colombia | Boyacá     | Soatá        | 5,262,563     | 6.7211973           | Tcl |
| 203       | <i>Triatoma dimidiata</i> | Adult | Colombia | Boyacá     | Boavita      | 906           | 2.9571282           | Tcl |
| 215       | <i>Triatoma dimidiata</i> | Adult | Colombia | Boyacá     | Soatá        | 35,752,096    | 7.5533015           | Tcl |
| 221       | <i>Triatoma dimidiata</i> | Nymph | Colombia | Boyacá     | Tipacoque    | 15,968        | 4.2032505           | Tcl |

|                 |                            |       |          |           |                |             |           |     |
|-----------------|----------------------------|-------|----------|-----------|----------------|-------------|-----------|-----|
| <b>235</b>      | <i>Triatoma dimidiata</i>  | Adult | Colombia | Boyacá    | Tipacoque      | 42,480      | 4.6281845 | Tcl |
| <b>243</b>      | <i>Triatoma dimidiata</i>  | Adult | Colombia | Boyacá    | Socota         | 121,577,568 | 8.0848535 | Tcl |
| <b>244</b>      | <i>Triatoma dimidiata</i>  | Nymph | Colombia | Boyacá    | Panqueba       | 19,033,480  | 7.2795182 | Tcl |
| <b>247</b>      | <i>Triatoma dimidiata</i>  | Adult | Colombia | Boyacá    | San Mateo      | 48,741,376  | 7.6878978 | Tcl |
| <b>253</b>      | <i>Triatoma dimidiata</i>  | Adult | Colombia | Boyacá    | Soatá          | 30,008,396  | 7.4772428 | Tcl |
| <b>265</b>      | <i>Triatoma dimidiata</i>  | Adult | Colombia | Boyacá    | Socota         | 60,196      | 4.7795676 | Tcl |
| <b>DNA 132d</b> | <i>Rhodnius prolixus</i>   | Adult | Colombia | Casanare  | Paz de Ariporo | -           | -         | -   |
| <b>DNA 133d</b> | <i>Rhodnius prolixus</i>   | Adult | Colombia | Casanare  | Paz de Ariporo | 31,704,430  | 7.5011199 | Tcl |
| <b>DNA 134d</b> | <i>Rhodnius prolixus</i>   | Adult | Colombia | Casanare  | Paz de Ariporo | -           | -         | -   |
| <b>DNA 136</b>  | <i>Rhodnius pallescens</i> | Adult | Colombia | Cesar     | Valledupar     | 50,984      | 4.7074371 | Tcl |
| <b>DNA 137</b>  | <i>Rhodnius pallescens</i> | Adult | Colombia | Cesar     | Valledupar     | -           | -         | -   |
| <b>DNA 138</b>  | <i>Rhodnius pallescens</i> | Adult | Colombia | Cesar     | Valledupar     | -           | -         | -   |
| <b>DNA 139</b>  | <i>Rhodnius pallescens</i> | Adult | Colombia | Cesar     | Valledupar     | 74,601      | 4.8727455 | Tcl |
| <b>DNA 140d</b> | <i>Rhodnius prolixus</i>   | Adult | Colombia | Arauca    | Puerto Rondón  | 26,070      | 4.4161442 | Tcl |
| <b>DNA 141d</b> | <i>Rhodnius prolixus</i>   | Adult | Colombia | Arauca    | Puerto Rondón  | 787         | 2.8960731 | NA  |
| <b>DNA 144</b>  | <i>Rhodnius pallescens</i> | Adult | Colombia | Antioquia | Necocli        | 27,816      | 4.4442991 | Tcl |
| <b>DNA 145</b>  | <i>Rhodnius pallescens</i> | Adult | Colombia | Antioquia | Necocli        | 787         | 2.8960527 | NA  |
| <b>DNA 146</b>  | <i>Rhodnius pallescens</i> | Adult | Colombia | Antioquia | Necocli        | 9,719,022   | 6.9876226 | Tcl |
| <b>DNA 147</b>  | <i>Rhodnius pallescens</i> | Adult | Colombia | Antioquia | Necocli        | 1,089,328   | 6.0371585 | Tcl |
| <b>DNA 147d</b> | <i>Rhodnius prolixus</i>   | Adult | Colombia | Casanare  | Tamara         | 2,332,787   | 6.3678750 | Tcl |
| <b>DNA 152d</b> | <i>Rhodnius prolixus</i>   | Adult | Colombia | Casanare  | Tamara         | 5,442,715   | 6.7358156 | Tcl |

|                 |                                  |       |          |          |          |             |           |     |
|-----------------|----------------------------------|-------|----------|----------|----------|-------------|-----------|-----|
| <b>DNA 154d</b> | <i>Rhodnius prolixus</i>         | Adult | Colombia | Casanare | Tamara   | 39,216,532  | 7.5934692 | Tcl |
| <b>DNA 161d</b> | <i>Rhodnius prolixus</i>         | Adult | Colombia | Casanare | Pore     | 362,335     | 5.5591104 | Tcl |
| <b>DNA 162d</b> | <i>Rhodnius prolixus</i>         | Adult | Colombia | Casanare | Pore     | 3,907,144   | 6.5918594 | Tcl |
| <b>DNA 167d</b> | <i>Rhodnius prolixus</i>         | Adult | Colombia | Casanare | Pore     | 22,351,330  | 7.3493034 | Tcl |
| <b>DNA 169d</b> | <i>Rhodnius prolixus</i>         | Adult | Colombia | Casanare | Pore     | 36,838,908  | 7.5663067 | Tcl |
| <b>DNA 185</b>  | <i>Rhodnius pallescens</i>       | Adult | Colombia | Bolivar  | Mompox   | 16,066      | 4.2058951 | -   |
| <b>DNA 186</b>  | <i>Rhodnius pallescens</i>       | Adult | Colombia | Bolivar  | Mompox   | 16,066      | 4.2058951 | NA  |
| <b>DNA 187</b>  | <i>Rhodnius pallescens</i>       | Adult | Colombia | Bolivar  | Mompox   | 627         | 2.7970192 | NA  |
| <b>DNA 188</b>  | <i>Rhodnius pallescens</i>       | Adult | Colombia | Bolivar  | Mompox   | 336         | 2.5260656 | NA  |
| <b>DNA 201d</b> | <i>Panstrongylus geniculatus</i> | Adult | Colombia | Meta     | Restrepo | 10,291,462  | 7.0124771 | Tcl |
| <b>DNA 202d</b> | <i>Panstrongylus geniculatus</i> | Adult | Colombia | Meta     | Restrepo | 162,278     | 5.2102590 | Tcl |
| <b>DNA 203d</b> | <i>Panstrongylus geniculatus</i> | Adult | Colombia | Meta     | Restrepo | 39,889      | 4.6008550 | Tcl |
| <b>DNA 204d</b> | <i>Panstrongylus geniculatus</i> | Adult | Colombia | Meta     | Restrepo | 149,983,808 | 8.1760444 | Tcl |
| <b>DNA 207d</b> | <i>Panstrongylus geniculatus</i> | Adult | Colombia | Meta     | Restrepo | 18,781,748  | 7.2737360 | NA  |
| <b>DNA 208d</b> | <i>Panstrongylus geniculatus</i> | Adult | Colombia | Meta     | Restrepo | 73,967      | 4.8690389 | Tcl |
| <b>DNA 209d</b> | <i>Panstrongylus geniculatus</i> | Adult | Colombia | Meta     | Restrepo | 25,790,952  | 7.4114674 | Tcl |
| <b>DNA 212d</b> | <i>Panstrongylus geniculatus</i> | Adult | Colombia | Meta     | Restrepo | 159,226,192 | 8.2020145 | NA  |

|                 |                                  |       |          |          |              |            |           |      |
|-----------------|----------------------------------|-------|----------|----------|--------------|------------|-----------|------|
| <b>DNA 213d</b> | <i>Panstrongylus geniculatus</i> | Adult | Colombia | Meta     | Restrepo     | 8,173,628  | 6.9124148 | Tcl  |
| <b>DNA 214d</b> | <i>Panstrongylus geniculatus</i> | Adult | Colombia | Meta     | Restrepo     | 5,727,317  | 6.7579512 | Tcll |
| <b>DNA 215d</b> | <i>Panstrongylus geniculatus</i> | Adult | Colombia | Meta     | Restrepo     | 10,112,290 | 7.0048495 | Tcl  |
| <b>DNA 230</b>  | <i>Psammolestes arthuri</i>      | Adult | Colombia | Casanare | Mani         | 68         | 1.8356851 | NA   |
| <b>DNA 383</b>  | <i>Rhodnius colombiensis</i>     | Adult | Colombia | Tolima   | Coyaima      | 585        | 2.7672935 | NA   |
| <b>DNA 384</b>  | <i>Rhodnius colombiensis</i>     | Adult | Colombia | Tolima   | Coyaima      | 472        | 2.6738620 | NA   |
| <b>DNA 385</b>  | <i>Rhodnius colombiensis</i>     | Adult | Colombia | Tolima   | Coyaima      | -          | -         | -    |
| <b>DNA 386</b>  | <i>Rhodnius colombiensis</i>     | Adult | Colombia | Tolima   | Coyaima      | 260        | 2.4145308 | NA   |
| <b>DNA 387</b>  | <i>Rhodnius colombiensis</i>     | Adult | Colombia | Tolima   | Coyaima      | 2,759      | 3.4407426 | NA   |
| <b>DNA 398</b>  | <i>Rhodnius colombiensis</i>     | Adult | Colombia | Tolima   | Coyaima      | 2,429      | 3.3853937 | NA   |
| <b>DNA 399</b>  | <i>Rhodnius colombiensis</i>     | Adult | Colombia | Tolima   | Coyaima      | 266        | 2.4242862 | NA   |
| <b>DNA 400</b>  | <i>Rhodnius colombiensis</i>     | Adult | Colombia | Tolima   | Coyaima      | 261        | 2.4166632 | NA   |
| <b>DNA 401</b>  | <i>Rhodnius colombiensis</i>     | Adult | Colombia | Tolima   | Coyaima      | 111        | 2.0463024 | NA   |
| <b>DNA 402</b>  | <i>Rhodnius colombiensis</i>     | Adult | Colombia | Tolima   | Coyaima      | -          | -         | -    |
| <b>DNA 425</b>  | <i>Rhodnius pallescens</i>       | Adult | Colombia | Bolivar  | San Fernando | 138        | 2.1390807 | NA   |
| <b>DNA 426</b>  | <i>Rhodnius pallescens</i>       | Adult | Colombia | Bolivar  | San Fernando | -          | -         | -    |
| <b>DNA 427</b>  | <i>Rhodnius pallescens</i>       | Adult | Colombia | Bolivar  | San Fernando | 34         | 1.5269295 | NA   |

|                |                                  |       |          |                    |                              |           |           |     |
|----------------|----------------------------------|-------|----------|--------------------|------------------------------|-----------|-----------|-----|
| <b>DNA 428</b> | <i>Rhodnius pallescens</i>       | Adult | Colombia | Bolivar            | San Fernando                 | 119       | 2.0749502 | NA  |
| <b>DNA105d</b> | <i>Rhodnius prolixus</i>         | Adult | Colombia | Arauca             | Tame                         | 1,095     | 3.0393868 | NA  |
| <b>DNA112d</b> | <i>Rhodnius prolixus</i>         | Adult | Colombia | Arauca             | Saravena                     | 169       | 2.2269245 | NA  |
| <b>DNA115d</b> | <i>Rhodnius prolixus</i>         | Adult | Colombia | Arauca             | Saravena                     | 526,503   | 5.7214005 | Tcl |
| <b>DNA117d</b> | <i>Rhodnius prolixus</i>         | Adult | Colombia | Arauca             | Arauca                       | 529       | 2.7234248 | Tcl |
| <b>DNA118d</b> | <i>Rhodnius prolixus</i>         | Adult | Colombia | Arauca             | Arauca                       | 12,895    | 4.1104207 | Tcl |
| <b>DNA12d</b>  | <i>Rhodnius pallescens</i>       | Adult | Colombia | Bolivar            | Mompox                       | 32        | 1.4984311 | -   |
| <b>DNA14d</b>  | <i>Rhodnius pallescens</i>       | Adult | Colombia | Bolivar            | Mompox                       | -         | -         | -   |
| <b>DNA15d</b>  | <i>Rhodnius pallescens</i>       | Adult | Colombia | Bolivar            | Mompox                       | 21        | 1.3173026 | NA  |
| <b>DNA19d</b>  | <i>Rhodnius prolixus</i>         | Adult | Colombia | Magdalena          | Sierra Nevada de Santa Marta | 3,640     | 3.5610633 | -   |
| <b>DNA1d</b>   | <i>Eratyrus mucronatus</i>       | Adult | Colombia | Norte de santander | Los patios (Santa clara)     | 302       | 2.4801783 | Tcl |
| <b>DNA21d</b>  | <i>Rhodnius prolixus</i>         | Adult | Colombia | Magdalena          | Sierra Nevada de Santa Marta | 1,768     | 3.2474050 | -   |
| <b>DNA251d</b> | <i>Panstrongylus geniculatus</i> | Adult | Colombia | Casanare           | Paz de Ariporo               | 1,409,156 | 6.1489590 | Tcl |
| <b>DNA253d</b> | <i>Panstrongylus geniculatus</i> | Adult | Colombia | Casanare           | Paz de Ariporo               | 7,949,679 | 6.9003496 | Tcl |
| <b>DNA255d</b> | <i>Psammolestes arthuri</i>      | Adult | Colombia | Casanare           | Pore                         | 14        | 1.1604392 | NA  |
| <b>DNA257d</b> | <i>Psammolestes arthuri</i>      | Adult | Colombia | Casanare           | Pore                         | -         | -         | -   |
| <b>DNA261d</b> | <i>Psammolestes arthuri</i>      | Adult | Colombia | Casanare           | Pore                         | 66        | 1.8200522 | NA  |
| <b>DNA263d</b> | <i>Psammolestes arthuri</i>      | Adult | Colombia | Casanare           | Pore                         | 25        | 1.4006630 | NA  |
| <b>DNA285d</b> | <i>Psammolestes arthuri</i>      | Adult | Colombia | Casanare           | Mani                         | 1,016     | 3.0066914 | NA  |

|                |                                  |       |          |                    |                              |            |           |     |
|----------------|----------------------------------|-------|----------|--------------------|------------------------------|------------|-----------|-----|
| <b>DNA299d</b> | <i>Psammolestes arthuri</i>      | Adult | Colombia | Casanare           | Mani                         | 35         | 1.5378319 | NA  |
| <b>DNA2d</b>   | <i>Eratyrus mucronatus</i>       | Adult | Colombia | Norte de santander | Los patios (Santa clara)     | 628        | 2.7978026 | NA  |
| <b>DNA301d</b> | <i>Psammolestes arthuri</i>      | Adult | Colombia | Casanare           | Mani                         | 4,402      | 3.6436879 | NA  |
| <b>DNA305d</b> | <i>Psammolestes arthuri</i>      | Adult | Colombia | Casanare           | Mani                         | -          | -         | -   |
| <b>DNA307d</b> | <i>Psammolestes arthuri</i>      | Adult | Colombia | Casanare           | Mani                         | -          | -         | -   |
| <b>DNA309d</b> | <i>Psammolestes arthuri</i>      | Adult | Colombia | Casanare           | Mani                         | -          | -         | -   |
| <b>DNA315d</b> | <i>Panstrongylus geniculatus</i> | Adult | Colombia | Casanare           | Paz de Ariporo               | -          | -         | -   |
| <b>DNA319d</b> | <i>Rhodnius prolixus</i>         | Adult | Colombia | Arauca             | Fortul                       | 52,900,404 | 7.7234590 | Tcl |
| <b>DNA323d</b> | <i>Rhodnius prolixus</i>         | Adult | Colombia | Arauca             | Fortul                       | 12,528     | 4.0978742 | Tcl |
| <b>DNA325d</b> | <i>Rhodnius prolixus</i>         | Adult | Colombia | Arauca             | Fortul                       | 18,831     | 4.2748626 | Tcl |
| <b>DNA329d</b> | <i>Rhodnius prolixus</i>         | Adult | Colombia | Arauca             | Puerto Rondón                | -          | -         | -   |
| <b>DNA32d</b>  | <i>Rhodnius prolixus</i>         | Adult | Colombia | Magdalena          | Sierra Nevada de Santa Marta | 153        | 2.1835157 | NA  |
| <b>DNA333d</b> | <i>Panstrongylus geniculatus</i> | Adult | Colombia | Arauca             | Arauca                       | -          | -         | -   |
| <b>DNA341d</b> | <i>Panstrongylus geniculatus</i> | Adult | Colombia | Arauca             | Fortul                       | -          | -         | -   |
| <b>DNA349d</b> | <i>Triatoma maculata</i>         | Adult | Colombia | Guajira            |                              | 482        | 2.6826938 | NA  |
| <b>DNA34d</b>  | <i>Rhodnius prolixus</i>         | Adult | Colombia | Magdalena          | Sierra Nevada de Santa Marta | -          | -         | -   |
| <b>DNA371d</b> | <i>Panstrongylus geniculatus</i> | Adult | Colombia | Santander          | Playon                       | -          | -         | -   |
| <b>DNA377d</b> | <i>Psammolestes arthuri</i>      | Adult | Colombia | Casanare           | Tamara                       | 2,391      | 3.3786480 | Tcl |

|                |                             |       |          |                    |                          |         |           |     |
|----------------|-----------------------------|-------|----------|--------------------|--------------------------|---------|-----------|-----|
| <b>DNA379d</b> | <i>Psammolestes arthuri</i> | Adult | Colombia | Casanare           | Tamara                   | -       | -         | -   |
| <b>DNA381d</b> | <i>Psammolestes arthuri</i> | Adult | Colombia | Casanare           | Tamara                   | -       | -         | -   |
| <b>DNA383d</b> | <i>Psammolestes arthuri</i> | Adult | Colombia | Casanare           | Tamara                   | -       | -         | -   |
| <b>DNA385d</b> | <i>Psammolestes arthuri</i> | Adult | Colombia | Casanare           | Tamara                   | -       | -         | -   |
| <b>DNA387d</b> | <i>Psammolestes arthuri</i> | Adult | Colombia | Casanare           | Tamara                   | 4,681   | 3.6703173 | Tcl |
| <b>DNA38d</b>  | <i>Rhodnius prolixus</i>    | Adult | Colombia | Magdalena          | Von                      | -       | -         | -   |
| <b>DNA391d</b> | <i>Psammolestes arthuri</i> | Adult | Colombia | Casanare           | Tamara                   | -       | -         | -   |
| <b>DNA395d</b> | <i>Psammolestes arthuri</i> | Adult | Colombia | Casanare           | Tamara                   | 375     | 2.5743717 | NA  |
| <b>DNA397d</b> | <i>Psammolestes arthuri</i> | Adult | Colombia | Casanare           | Monterrey                | -       | -         | -   |
| <b>DNA399d</b> | <i>Psammolestes arthuri</i> | Adult | Colombia | Casanare           | Monterrey                | 1,040   | 3.0168846 | NA  |
| <b>DNA3d</b>   | <i>Eratyrus mucronatus</i>  | Adult | Colombia | Norte de santander | Los patios (Santa clara) | 91,116  | 4.9595957 | Tcl |
| <b>DNA403d</b> | <i>Psammolestes arthuri</i> | Adult | Colombia | Casanare           | Monterrey                | -       | -         | -   |
| <b>DNA405d</b> | <i>Psammolestes arthuri</i> | Adult | Colombia | Casanare           | Monterrey                | 661,689 | 5.8206537 | NA  |
| <b>DNA409d</b> | <i>Triatoma maculata</i>    | Adult | Colombia | Casanare           | Paz de Ariporo           | 51,683  | 4.7133506 | Tcl |
| <b>DNA413d</b> | <i>Psammolestes arthuri</i> | Adult | Colombia | Casanare           | Monterrey                | -       | -         | -   |
| <b>DNA415d</b> | <i>Psammolestes arthuri</i> | Adult | Colombia | Casanare           | Monterrey                | 4,927   | 3.6925973 | NA  |

|                |                                  |       |          |                    |                         |           |           |     |
|----------------|----------------------------------|-------|----------|--------------------|-------------------------|-----------|-----------|-----|
| <b>DNA42</b>   | <i>Rhodnius colombiensis</i>     | Adult | Colombia | Tolima             | Coyaima                 | 2,276     | 3.3570795 | NA  |
| <b>DNA45d</b>  | <i>Rhodnius prolixus</i>         | Adult | Colombia | Magdalena          | Von                     | 715       | 2.8541056 | NA  |
| <b>DNA462d</b> | <i>Panstrongylus geniculatus</i> | Adult | Colombia | Boyacá             | Susacón                 | 3,434     | 3.5358364 | NA  |
| <b>DNA464d</b> | <i>Panstrongylus geniculatus</i> | Adult | Colombia | Boyacá             | Susacón                 | -         | -         | -   |
| <b>DNA466d</b> | <i>Panstrongylus geniculatus</i> | Adult | Colombia | Boyacá             | Soata                   | 2,628,739 | 6.4197474 | Tcl |
| <b>DNA468d</b> | <i>Panstrongylus geniculatus</i> | Adult | Colombia | Boyacá             | Soata                   | 9,636,328 | 6.9839116 | Tcl |
| <b>DNA470d</b> | <i>Panstrongylus geniculatus</i> | Adult | Colombia | Boyacá             | San Pablo de Borbur     | 206,605   | 5.3151416 | Tcl |
| <b>DNA476d</b> | <i>Triatoma venosa</i>           | Adult | Colombia | Casanare           | Garoa                   | -         | -         | -   |
| <b>DNA478d</b> | <i>Triatoma venosa</i>           | Adult | Colombia | Casanare           | Garoa                   | 1,667     | 3.2218084 | NA  |
| <b>DNA47d</b>  | <i>Rhodnius prolixus</i>         | Adult | Colombia | Magdalena          | Von                     | 410       | 2.6123279 | NA  |
| <b>DNA480d</b> | <i>Rhodnius prolixus</i>         | Adult | Colombia | Boyacá             | Cubará                  | 1,333     | 3.1248256 | NA  |
| <b>DNA484d</b> | <i>Rhodnius prolixus</i>         | Adult | Colombia | Boyacá             | Cubará                  | 808       | 2.9072037 | NA  |
| <b>DNA488d</b> | <i>Triatoma venosa</i>           | Adult | Colombia | Casanare           | Garoa                   | -         | -         | -   |
| <b>DNA48d</b>  | <i>Rhodnius prolixus</i>         | Adult | Colombia | Magdalena          | Von                     | 682       | 2.8340398 | NA  |
| <b>DNA490d</b> | <i>Triatoma venosa</i>           | Adult | Colombia | Casanare           | Garoa                   | -         | -         | -   |
| <b>DNA492d</b> | <i>Triatoma venosa</i>           | Adult | Colombia | Boyacá             | Pachavita               | 6,708     | 3.8266168 | NA  |
| <b>DNA4d</b>   | <i>Eratyrus mucronatus</i>       | Adult | Colombia | Norte de santander | San cayetano (La playa) | 93,915    | 4.9727336 | Tcl |
| <b>DNA64</b>   | <i>Rhodnius colombiensis</i>     | Adult | Colombia | Tolima             | Coyaima                 | 4,902     | 3.6903502 | Tcl |
| <b>DNA65d</b>  | <i>Rhodnius prolixus</i>         | Adult | Colombia | Arauca             | Tame                    | -         | -         | -   |
| <b>DNA67</b>   | <i>Rhodnius colombiensis</i>     | Adult | Colombia | Tolima             | Coyaima                 | 302       | 2.4805168 | NA  |
| <b>DNA71</b>   | <i>Rhodnius prolixus</i>         | Adult | Colombia | Antioquia          | Necocli                 | 329       | 2.5171222 | NA  |



|               |                                  |       |          |           |                      |            |           |     |
|---------------|----------------------------------|-------|----------|-----------|----------------------|------------|-----------|-----|
| <b>DNA72</b>  | <i>Rhodnius prolixus</i>         | Adult | Colombia | Antioquia | Necocli              | 200        | 2.3018741 | NA  |
| <b>DNA80d</b> | <i>Panstrongylus geniculatus</i> | Adult | Colombia | Santander | Mogotes              | 28,438,366 | 7.4539046 | Tcl |
| <b>DNA94d</b> | <i>Rhodnius prolixus</i>         | Adult | Colombia | Casanare  | Yopal                | 108,849    | 5.0368248 | Tcl |
| <b>DNA95d</b> | <i>Rhodnius prolixus</i>         | Adult | Colombia | Casanare  | Yopal                | 2,242,750  | 6.3507808 | Tcl |
| <b>DNA96d</b> | <i>Rhodnius prolixus</i>         | Adult | Colombia | Casanare  | San Luis de Palenque | 62,999     | 4.7993333 | Tcl |
| <b>Tdis1</b>  | <i>Triatoma dispar</i>           | Adult | Colombia | Chocó     | San José del Palmar  | 7,609,587  | 6.8813611 | NA  |
| <b>Tdis2</b>  | <i>Triatoma dispar</i>           | Adult | Colombia | Chocó     | San José del Palmar  | 55,199     | 4.7419312 | Tcl |
| <b>Tv1</b>    | <i>Triatoma venosa</i>           | Adult | Colombia | Boyacá    | Zetaquira            | 147,299    | 5.1682012 | NA  |
| <b>Tv10</b>   | <i>Triatoma venosa</i>           | Adult | Colombia | Boyacá    | Garagoa              | 1,676      | 3.2242100 | NA  |
| <b>Tv11</b>   | <i>Triatoma venosa</i>           | Adult | Colombia | Boyacá    | Guateque             | 287        | 2.4580768 | NA  |
| <b>Tv12</b>   | <i>Triatoma venosa</i>           | Adult | Colombia | Boyacá    | Guateque             | 513        | 2.7104995 | Tcl |
| <b>Tv13</b>   | <i>Triatoma venosa</i>           | Adult | Colombia | Boyacá    | Zetaquira            | 1,031      | 3.0132632 | NA  |
| <b>Tv14</b>   | <i>Triatoma venosa</i>           | Adult | Colombia | Boyacá    | Miraflores           | 2,227      | 3.3476923 | NA  |
| <b>Tv15</b>   | <i>Triatoma venosa</i>           | Adult | Colombia | Boyacá    | Chinavita            | 417        | 2.6204101 | NA  |
| <b>Tv16</b>   | <i>Triatoma venosa</i>           | Adult | Colombia | Boyacá    | Chinavita            | 465        | 2.6675208 | NA  |
| <b>Tv17</b>   | <i>Triatoma venosa</i>           | Adult | Colombia | Boyacá    | Garagoa              | 115        | 2.0591517 | NA  |
| <b>Tv18</b>   | <i>Triatoma venosa</i>           | Adult | Colombia | Boyacá    | Garagoa              | 124        | 2.0924832 | NA  |
| <b>Tv19</b>   | <i>Triatoma venosa</i>           | Adult | Colombia | Boyacá    | Garagoa              | 1,305      | 3.1155790 | NA  |
| <b>Tv2</b>    | <i>Triatoma venosa</i>           | Adult | Colombia | Boyacá    | Garagoa              | 88,358     | 4.9462467 | Tcl |
| <b>Tv20</b>   | <i>Triatoma venosa</i>           | Adult | Colombia | Boyacá    | Miraflores           | 1,052      | 3.0219047 | NA  |
| <b>Tv21</b>   | <i>Triatoma venosa</i>           | Adult | Colombia | Boyacá    | Zetaquira            | 417        | 2.6196652 | NA  |
| <b>Tv22</b>   | <i>Triatoma venosa</i>           | Adult | Colombia | Boyacá    | Chinavita            | 23         | 1.3710638 | NA  |
| <b>Tv3</b>    | <i>Triatoma venosa</i>           | Adult | Colombia | Boyacá    | Zetaquira            | 1,385      | 3.1415686 | NA  |
| <b>Tv4</b>    | <i>Triatoma venosa</i>           | Adult | Colombia | Boyacá    | Miraflores           | 7,117      | 3.8523257 | NA  |
| <b>Tv5</b>    | <i>Triatoma venosa</i>           | Adult | Colombia | Boyacá    | Miraflores           | 1,930      | 3.2855716 | NA  |
| <b>Tv6</b>    | <i>Triatoma venosa</i>           | Adult | Colombia | Boyacá    | Guateque             | 4,750,815  | 6.6767681 | Tcl |

|            |                        |       |          |        |            |       |           |     |
|------------|------------------------|-------|----------|--------|------------|-------|-----------|-----|
| <b>Tv7</b> | <i>Triatoma venosa</i> | Adult | Colombia | Boyacá | Zetaquira  | 2,204 | 3.3431311 | Tcl |
| <b>Tv8</b> | <i>Triatoma venosa</i> | Adult | Colombia | Boyacá | La Capilla | 393   | 2.5944049 | NA  |
| <b>Tv9</b> | <i>Triatoma venosa</i> | Adult | Colombia | Boyacá | Somondoco  | 739   | 2.8687955 | NA  |
