# Supplementary material for: Trypanosoma cruzi Parasite Burdens of Several Triatomine Species in Colombia
Source: MDPI journal article supplement (doi:10.3390/tropicalmed7120445), 2022-12-19
Supplement: s1 [file s1]

Table S2. Genotyping result per species. Samples denoted as NA could not be genotyped by conventional PCR.

| <b>Species</b>                   | <b>NA</b> | <b>Tcl</b> | <b>Tcll</b> |
|----------------------------------|-----------|------------|-------------|
| <i>Eratyrus mucronatus</i>       | 1         | 3          | -           |
| <i>Panstrongylus geniculatus</i> | 3         | 14         | 1           |
| <i>Psammolestes arthuri</i>      | 11        | 2          | -           |
| <i>Rhodnius colombiensis</i>     | 10        | 1          | -           |
| <i>Rhodnius pallescens</i>       | 8         | 5          | -           |
| <i>Rhodnius prolixus</i>         | 13        | 18         | -           |
| <i>Triatoma dimidiata</i>        | -         | 30         | -           |
| <i>Triatoma dispar</i>           | 1         | 1          | -           |
| <i>Triatoma maculata</i>         | 1         | 1          | -           |
| <i>Triatoma venosa</i>           | 20        | 4          | -           |
| <b>Total</b>                     | <b>66</b> | <b>79</b>  | <b>1</b>    |
